# Supplementary material
Source: PubMed Central journal article supplement (PMC4654456)
Supplement: NIHMS695112-supplement-01.pdf [file NIHMS695112-supplement-01.pdf]

## **Supplemental Material**

### **Supplemental Methods:**

#### **Definition of Co-morbid Conditions:**

The presence or absence of co-morbid conditions in the Teen-LABS study was determined by trained study personnel following standard definitions using medical records, physical exam, participant interview and laboratory values.<sup>12</sup> Specifically, hypertension was defined as having systolic or diastolic blood pressure  $\geq$  95th percentile indexed to age, gender, and height during the baseline visit as measured using the standard Teen-LABS protocol, or current use of anti-hypertensive medication. The presence of dyslipidemia was defined as triglyceride value  $\geq$  130 mg/dL or LDL cholesterol  $\geq$  130 mg/dL or HDL cholesterol  $<$  40 mg/dL or use of medication for dyslipidemia. Diabetes mellitus type 2 was defined by presence of laboratory findings (baseline HbA1c of  $\geq$  6.5%, fasting glucose  $\geq$  126 mg/dL, or confirmatory 2 hour oral glucose tolerance test within prior 6 months) or use of medications to treat diabetes.

#### **Histological Analysis:**

The well-validated NASH Clinical Research Network scoring system was used by a central study hepatopathologist (DEK) to grade features of NAFLD and stage fibrosis, with all clinical characteristics masked. The NAFLD activity score (NAS, range 0-8) was calculated by combining individual component scores for steatosis (range 0-3), lobular inflammation (0-3) and ballooning degeneration (0-2). Fibrosis was categorized as: stage 0 (none); stage 1 including mild (1a), moderate zone 3 perisinusoidal (1b) or portal/periportal only (1c); stage 2 (mild/moderate zone 3 perisinusoidal and periportal); stage 3 (bridging fibrosis); or stage 4 (cirrhosis). Although no single histologic feature is considered diagnostic of NASH, a typical set of minimum criteria for definite NASH would include steatosis (more than 5%), lobular inflammation and hepatocyte injury as manifested by ballooning degeneration. Borderline

NASH cases demonstrated a lesser degree of one or more findings and were further designated as zone 1 or zone 3 accentuated pattern of lesions.

### **Missing Data**

All missing data were laboratory values, ranging from 3.4% (n=5) for white blood cell count to 18.9% for alkaline phosphatase (n=28). The SAS (version 9.4) MI procedure was used to generate 35 imputed data sets for use in multivariable modeling analyses. Four subjects with diabetes who were receiving exogenous insulin were excluded from insulin or HOMA-IR calculations (n=144), as the insulin levels in those subjects may not reflect endogenous insulin secretion, invalidating calculation of HOMA-IR.

### **Microarray Methodology:**

Additional liver tissue, obtained at time of the intraoperative liver biopsy and immediately submerged into RNAlater® solution (Qiagen, Venlo, The Netherlands), was available in a subset of 67 participants from the analysis cohort. The quality of the total RNA samples was analyzed by running a RNA 6000 Nano assay with the Agilent 2100 bioanalyzer. Genome wide liver expression datasets for individual participants were generated using biotinylated cRNAs synthesized from 0.5 µg of total RNA isolated from frozen liver sample. The cRNA pools were hybridized to oligonucleotide-based Affymetrix Human Gene 1.0 ST Array (Affymetrix, Santa Clara, CA, USA) carrying over 700,000 unique oligonucleotide probes analyzing the expression level of 28,869 best characterized human genes. The hybridized arrays were scanned and monitored for specific signals with GeneChip® Operating Software. Affymetrix CEL files were imported into GeneSpring v 12.6.1 (Agilent Technologies, Santa Clara, CA, USA) and subjected to Robust Multichip Average 16 normalization. Using the GeneSpring platform, standard “per-gene” quantile normalization was performed for the entire gene expression dataset, prior to statistical analysis as outlined in the main manuscript. Additionally, we filtered genes with a

requirement of an intensity value of 50 in 100% of all samples in at least one of the histological categories. Microarray data are available through the National Center for Biotechnology Information's Gene Expression Omnibus (GSE66676).

## **SUPPLEMENTAL TABLE LEGEND**

(Tables uploaded separately)

**Supplemental Table 1: Sample characteristics of Teen-LABS participants with and without intra-operative liver biopsy.** Reported p-values are two-sided and considered statistically significant at  $\leq 0.05$ .

**Supplemental Table 2: Crude and adjusted odds ratios of increasing NAFLD severity by clinical characteristic among participants with NAFLD (excluding those with Not-NAFLD).**

A cumulative logit model was used to evaluate predictors of increasing liver disease severity only among participants with NAFLD, ordinally defined as 1) NAFL (not NASH), 2) Borderline NASH and 3) Definite NASH. The model simultaneously evaluated two separate comparisons: 1) all NASH (Definite NASH or Borderline NASH) vs. NAFL; 2) Definite NASH vs. [Borderline NASH or NAFL]. The final model met the proportional odds assumption ( $p = 0.63$ ), confirming no difference in estimates between the two comparisons. All demographic and clinical variables listed in Table 2 were considered for inclusion in the final models. ALT elevation was categorized as normal ( $< 22$  U/L for females,  $< 26$  U/L for males), mild (22-39 U/L for females, 26-39 U/L for males) or high ( $\geq 40$  U/L). Reported p-values are two-sided and considered statistically significant at  $\leq 0.05$ .

**Supplemental Table 3: Crude and adjusted prevalence ratios for presence of any degree of NAFLD (all NAFLD subgroups combined) versus not NAFLD.** Modified poisson

regression with robust estimates (SAS Proc GENMOD) was used to evaluate predictors of any degree of NAFLD (NAFL, Borderline and Definite NASH combined) vs. No NAFLD. All demographic and clinical variables listed in Table 2 were considered for inclusion in the final models. Reported p-values are two-sided and considered statistically significant at  $\leq 0.05$ .

**Supplemental Table 4: Top up and down-regulated genes identified in comparisons of Borderline NASH, Definite NASH and Not NAFLD.** The top 15 up- and 15 down-regulated genes identified in each comparison of 1) Borderline NASH vs. Not NAFLD, 2) Definite NASH vs. Not NAFLD and 3) Borderline vs. Definite NASH are shown in alphabetical order of gene symbol, including gene description, fold change in the respective comparison(s), and attributed function. Some genes were differentially expressed in more than one comparison.

**Supplemental Table 5: Key biological processes/pathways enriched in definite NASH relative to borderline NASH.** Associated genes were uncovered through ontological analysis of genes differentially regulated between definite NASH and borderline NASH. Genes in italics have been previously reported to be correlated with severely fibrotic (stage 3 or 4) NAFLD in adults.<sup>23</sup>

**Supplemental Table 1: Sample Characteristics of Teen- LABS Participants with Liver Biopsy vs. Participants without Liver Biopsies (of total Teen-LABS cohort n=242)**

|                                                                    | Teen-LABS with<br>baseline intra-<br>operative Liver Biopsy<br>(n=165) | Teen-LABS without<br>baseline intra-<br>operative Liver Biopsy<br>(n=77) | P value |
|--------------------------------------------------------------------|------------------------------------------------------------------------|--------------------------------------------------------------------------|---------|
| <b>Male</b>                                                        | 45 (27%)                                                               | 14 (18%)                                                                 | 0.13    |
| <b>Age in y, mean ± SD (min, max)</b>                              | 16.9 ± 1.55 (13.3, 19.9)                                               | 17.5 ± 1.51(13.5, 20.0)                                                  | < 0.01  |
| <b>White race (vs. non-white)</b>                                  | 113 (68%)                                                              | 61 (79%)                                                                 | 0.08    |
| <b>Hispanic ethnicity</b>                                          | 13 (8%)                                                                | 4 (5%)                                                                   | 0.44    |
| <b>BMI in kg/m<sup>2</sup>, median (min, max)</b>                  | 51.6 (34.0, 87.7)                                                      | 48.0 (38.7, 74.3)                                                        | < 0.01  |
| <b>Pre-op weight loss during preparation for bariatric surgery</b> |                                                                        |                                                                          |         |
| No weight loss                                                     | 78 (47%)                                                               | 41 (53%)                                                                 | 0.44    |
| Weight loss of <5%                                                 | 69 (42%)                                                               | 26 (34%)                                                                 |         |
| Weight loss of 6-10%                                               | 16 (10%)                                                               | 10 (13%)                                                                 |         |
| Weight loss >10%                                                   | 2 (1%)                                                                 | 0 (0%)                                                                   |         |
| <b>ALT (U/L), median (IQR)</b>                                     | 27 (20, 38)<br>(n=136)                                                 | 34 (23, 47)<br>(n=63)                                                    | 0.14    |
| <b>Triglycerides, mg/dL, median (IQR)</b>                          | 116.0 (83, 167.5)                                                      | 103.5 (76, 154)                                                          | 0.21    |
| <b>Dyslipidemia, n (%)</b>                                         | 130 (79%)                                                              | 50 (65%)                                                                 | 0.02    |
| <b>Diabetes, n (%)</b>                                             | 23 (14%)                                                               | 10 (13%)                                                                 | 0.84    |

**Supplemental Table 2. Crude and Adjusted Odds Ratios of Increasing NAFLD Severity by Clinical Characteristic Among Participants with NAFLD (excluding Not NAFLD category)**

| <b>Characteristic<br/>(Groups)</b> | <b>Unadjusted</b> |         | <b>Adjusted</b>   |         |
|------------------------------------|-------------------|---------|-------------------|---------|
|                                    | OR (95% CI)       | p-value | OR (95% CI)       | p-value |
| <b>Sex</b>                         |                   | 0.05    |                   |         |
| Female                             | 1.00              |         |                   |         |
| Male                               | 2.46 (0.99, 6.11) |         |                   |         |
| <b>Age Categories (yrs)</b>        |                   | 0.43    |                   |         |
| 13 – 15                            | 1.00              |         |                   |         |
| 16 – 17                            | 2.00 (0.66, 6.12) |         |                   |         |
| 18 +                               | 1.25 (0.37, 4.19) |         |                   |         |
| <b>Race</b>                        |                   | 0.39    |                   |         |
| White                              | 1.00              |         |                   |         |
| Black/Other                        | 1.52 (0.58, 3.95) |         |                   |         |
| <b>BMI (kg/m<sup>2</sup>)</b>      | 1.00 (0.96, 1.05) | 0.90    |                   |         |
| <b>ALT Elevation</b>               |                   | 0.26    |                   |         |
| Normal                             | 1.00              |         |                   |         |
| Mild                               | 0.97 (0.28, 3.44) |         |                   |         |
| High                               | 2.28 (0.61, 8.66) |         |                   |         |
| <b>ALK</b>                         | 1.00 (0.99, 1.02) | 0.34    | 1.01 (1.00, 1.03) | 0.07    |
| <b>Glucose</b>                     |                   | <.02    |                   |         |
| < 100                              | 1.00              |         |                   |         |
| 100-125                            | 1.49 (0.50, 4.44) |         |                   |         |

|                         |                    |      |                    |
|-------------------------|--------------------|------|--------------------|
| ≥ 126                   | 8.20 (2.46, 27.33) |      |                    |
| <b>HOMA-IR</b>          | 1.03 (0.96, 1.11)  | 0.41 |                    |
| <b>Triglycerides</b>    | 1.00 (1.00, 1.01)  | 0.34 |                    |
| <b>Albumin</b>          | 0.40 (0.08, 2.06)  | 0.27 |                    |
| <b>White Blood Cell</b> | 1.10 (0.94, 1.28)  | 0.23 |                    |
| <b>Diabetes</b>         |                    | <.01 | <.01               |
| No                      | 1.00               |      | 1.00               |
| Yes                     | 8.51 (2.70, 26.80) |      | 12.01 (3.48,41.40) |
| <b>Hypertension</b>     |                    | 0.05 |                    |
| No                      | 1.00               |      |                    |
| Yes                     | 2.49 (0.99, 6.24)  |      |                    |

---

**Supplemental Table 3: Crude and Adjusted Prevalence Ratios for Presence of Any NAFLD vs.****Not NAFLD**

| <b>Characteristic<br/>(Groups)</b> | <b>Unadjusted</b> |         | <b>Adjusted</b>   |         |
|------------------------------------|-------------------|---------|-------------------|---------|
|                                    | PR (95% CI)       | P-Value | PR (95% CI)       | P-Value |
| <b>Sex</b>                         |                   | 0.19    |                   |         |
| Female                             | 1.00              |         |                   |         |
| Male                               | 1.35 (0.86, 2.11) |         |                   |         |
| <b>Age Categories (yrs)</b>        |                   | 0.49    |                   |         |
| 13-15                              | 1.00              |         |                   |         |
| 16-17                              | 1.06 (0.63, 1.79) |         |                   |         |
| 18-19                              | 1.23 (0.70, 2.14) |         |                   |         |
| <b>Race</b>                        |                   | 0.44    |                   |         |
| White                              | 1.00              |         |                   |         |
| Black/Other                        | 0.83 (0.51, 1.33) |         |                   |         |
| <b>BMI (kg/m<sup>2</sup>)</b>      | 1.01 (0.99, 1.03) | 0.22    |                   |         |
| <b>ALT Elevation</b>               |                   | <.01    |                   | <.01    |
| Normal                             | 1.00              |         | 1.00              |         |
| Mild                               | 1.63 (0.91, 2.94) |         | 1.63 (0.91, 2.94) |         |
| High                               | 2.09 (1.11, 3.93) |         | 2.09 (1.11, 3.93) |         |
| <b>ALK</b>                         | 1.00 (0.99, 1.00) | 0.60    |                   |         |
| <b>Glucose</b>                     |                   | 0.06    |                   |         |
| < 100                              | 1.00              |         |                   |         |
| 100-125                            | 1.14 (0.68, 1.90) |         |                   |         |
| ≥ 126                              | 1.52 (0.84, 2.76) |         |                   |         |



|                         |                   |      |
|-------------------------|-------------------|------|
| <b>HOMA-IR</b>          | 1.02 (0.99, 1.05) | 0.15 |
| <b>Triglycerides</b>    | 1.00 (1.00, 1.01) | 0.05 |
| <b>Albumin</b>          | 1.33 (0.67, 2.64) | 0.42 |
| <b>White Blood Cell</b> | 1.04 (0.96, 1.12) | 0.37 |
| <b>Diabetes</b>         |                   | 0.21 |
| No                      | 1.00              |      |
| Yes                     | 1.42 (0.82, 2.47) |      |
| <b>Hypertension</b>     |                   | 0.11 |
| No                      | 1.00              |      |
| Yes                     | 1.42 (0.93, 2.17) |      |

---

**Supplemental Table 4. Top up- and down-regulated genes identified in comparisons of Definite NASH, Borderline NASH and Not NAFLD.**

| <b>Gene Symbol</b> | <b>Gene Description</b>                        | <b>Comparison(s) and Fold Change</b>                                                    | <b>Gene Function</b>                                                                             |
|--------------------|------------------------------------------------|-----------------------------------------------------------------------------------------|--------------------------------------------------------------------------------------------------|
| ACOT11             | Acyl-CoA thioesterase 11                       | Borderline NASH vs Not NAFLD: FC = -1.59<br>Definite NASH vs Not NAFLD: FC = -2.13      | Catalyst for the conversion of activated fatty acids to non-esterified fatty acid and coenzyme A |
| ACSL4              | Acyl-CoA synthetase long-chain family member 4 | Borderline NASH vs Not NAFLD: FC = 1.81                                                 | Converts free long-chain fatty acids into fatty acyl-CoA esters                                  |
| ASPG               | Asparaginase                                   | Borderline NASH vs Not NAFLD: FC = -1.55                                                | Exhibits lysophospholipase, transacylase, PAF acetylhydrolase and asparaginase activities        |
| C5orf27            | Chromosome 5 open reading frame 27             | Definite NASH vs Not NAFLD: FC = -2.549<br>Definite NASH vs Borderline NASH: FC = -2.11 | Uncharacterized                                                                                  |
| CD5L               | CD5 molecule-like                              | Definite NASH vs Borderline NASH: FC = -1.92                                            | Apoptosis inhibitor                                                                              |
| CFHR1              | Complement factor H-related 1                  | Definite NASH vs Borderline NASH: FC = -2.09                                            | Complement regulation and lipid metabolism                                                       |
| CFHR2              | Complement factor H-related 2                  | Definite NASH vs Borderline NASH: FC = -1.95                                            | Complement regulation and lipid metabolism                                                       |
| CFHR3              | Complement factor H-related 3                  | Borderline NASH vs Not NAFLD: FC = 2.21                                                 | Complement regulation                                                                            |
| CHI3L1             | Chitinase 3-like 1 (cartilage glycoprotein-39) | Borderline NASH vs Not NAFLD: FC = 2.145<br>Definite NASH vs Not NAFLD: FC = 2.26       | Pathogen defense and tissue remodeling                                                           |

|        |                                                       |                                                                                          |                                                                      |
|--------|-------------------------------------------------------|------------------------------------------------------------------------------------------|----------------------------------------------------------------------|
| CLGN   | Calmegin                                              | Definite NASH vs Borderline NASH: FC = -1.95                                             | Unfolded protein binding and calcium ion binding                     |
| COL1A1 | Collagen, type I, alpha 1                             | Definite NASH vs Not NAFLD: FC = 2.80<br>Definite NASH vs Borderline NASH: FC = 3.20     | Platelet-derived growth factor binding and identical protein binding |
| COL1A2 | Collagen, type I, alpha 2                             | Definite NASH vs Not NAFLD: FC = 2.645<br>Definite NASH vs Borderline NASH: FC = 2.64    | Protein binding, bridging, and identical protein binding             |
| CYP7A1 | Cytochrome P450, family 7, subfamily A, polypeptide 1 | Borderline NASH vs Not NAFLD: FC = 2.50<br>Definite NASH vs Not NAFLD: FC = 3.13         | Cholesterol catabolism and bile acid biosynthesis                    |
| DUSP1  | Dual specificity phosphatase 1                        | Definite NASH vs Not NAFLD: FC = -2.04<br>Definite NASH vs Borderline NASH: FC = -1.94   | Dephosphorylates MAP kinase, regulating activity during meiosis      |
| FABP5  | Fatty acid binding protein 5                          | Definite NASH vs Not NAFLD: FC = 2.85<br>Definite NASH vs Borderline NASH: FC = 2.63     | Fatty acid uptake, transport, and metabolism                         |
| GPAM   | Glycerol-3-phosphate acyltransferase, mitochondrial   | Borderline NASH vs Not NAFLD: FC = 1.79<br>Definite NASH vs Borderline NASH: FC = -2.55  | Glycerolipid biosynthesis                                            |
| GPNMB  | Glycoprotein (transmembrane) nmb                      | Definite NASH vs Not NAFLD: FC = 2.56<br>Definite NASH vs Borderline NASH: FC = 1.87     | Growth delay and reduction of metastatic potential                   |
| GSTA2  | Glutathione S-transferase alpha 2                     | Borderline NASH vs Not NAFLD: FC = 1.734<br>Definite NASH vs Borderline NASH: FC = -1.95 | Detoxification of electrophilic compounds by glutathione conjugation |
| GSTM1  | Glutathione S-transferase mu 1                        | Borderline NASH vs Not NAFLD: FC = -2.30<br>Definite NASH vs Not NAFLD: FC = -4.17       | Detoxification of electrophilic compounds by glutathione conjugation |

|              |                                                        |                                                                                  |                                                                                  |
|--------------|--------------------------------------------------------|----------------------------------------------------------------------------------|----------------------------------------------------------------------------------|
| GSTT1        | Glutathione S-transferase theta 1                      | Borderline NASH vs Not NAFLD: FC = 1.92                                          | Detoxification of electrophilic compounds by glutathione conjugation             |
| H19          | H19, imprinted maternally expressed transcript         | Definite NASH vs Not NAFLD: FC = -2.17                                           | Tumor suppressor                                                                 |
| HGFAC        | HGF activator                                          | Borderline NASH vs Not NAFLD: FC = -1.70                                         | Conversion of hepatocyte growth factor to the active form                        |
| HLA-DQA1     | Major histocompatibility complex, class II, DQ alpha 1 | Borderline NASH vs Not NAFLD: FC = -1.64                                         | Presents peptides derived from extracellular proteins for immune system function |
| HSD17B14     | Hydroxysteroid (17-beta) dehydrogenase 14              | Definite NASH vs Borderline NASH: FC = 2.14                                      | Steroid, fatty acid, prostaglandin, and xenobiotic metabolism                    |
| IGJ          | Immunoglobulin J polypeptide                           | Definite NASH vs Not NAFLD: FC = 2.10                                            | Antigen binding                                                                  |
| LIPC         | Lipase, hepatic                                        | Definite NASH vs Borderline NASH: FC = -2.01                                     | Triglyceride hydrolase, receptor-mediated lipoprotein uptake                     |
| LMF2         | Lipase maturation factor 2                             | Borderline NASH vs Not NAFLD: FC = -1.53                                         | Maturation of endoplasmic reticulum proteins                                     |
| LOC100293539 | NA                                                     | Borderline NASH vs Not NAFLD: FC = 6.60<br>Definite NASH vs Not NAFLD: FC = 7.36 | Uncharacterized                                                                  |
| LPL          | Lipoprotein lipase                                     | Definite NASH vs Borderline NASH: FC = 2.10                                      | Receptor-mediated lipoprotein uptake                                             |
| LUM          | Lumican                                                | Definite NASH vs Not NAFLD: FC = 2.36                                            | Extracellular matrix structural constituent and collagen binding                 |

|        |                                                                                  |                                                                                                                                    |                                                                                                             |
|--------|----------------------------------------------------------------------------------|------------------------------------------------------------------------------------------------------------------------------------|-------------------------------------------------------------------------------------------------------------|
| MALAT1 | Metastasis associated lung adenocarcinoma transcript 1                           | Borderline NASH vs Not NAFLD: FC = 1.81                                                                                            | Cell motility regulation                                                                                    |
| MARCO  | Macrophage receptor with collagenous structure                                   | Definite NASH vs Borderline NASH: FC = -2.06                                                                                       | Pattern recognition receptor that binds Gram-positive and Gram-negative bacteria                            |
| MLIP   | Muscle-enriched A-type laminin interacting protein                               | Borderline NASH vs Not NAFLD: FC = 1.97                                                                                            | Uncharacterized                                                                                             |
| MPLKIP | M-phase specific PLK1 interacting protein                                        | Borderline NASH vs Not NAFLD: FC = 1.78                                                                                            | Mitosis and cytokinesis regulator                                                                           |
| MT1E   | Metallothionein 1E                                                               | Definite NASH vs Not NAFLD: FC = -1.79                                                                                             | Heavy metal binding                                                                                         |
| MT1M   | Metallothionein 1M                                                               | Definite NASH vs Not NAFLD: FC = -2.16                                                                                             | Heavy metal binding                                                                                         |
| NROB2  | Nuclear receptor subfamily 0, group B, member 2                                  | Borderline NASH vs Not NAFLD: FC = -2.32<br>Definite NASH vs Not NAFLD: FC = -3.23                                                 | Negative regulator of receptor-dependent signaling pathways                                                 |
| NRG1   | Neuregulin 1                                                                     | Definite NASH vs Borderline NASH: FC = 2.05                                                                                        | Direct ligand for ERBB3 and ERBB4 tyrosine kinase receptors                                                 |
| PLA2G7 | Phospholipase A2, group VII (platelet-activating factor acetylhydrolase, plasma) | Definite NASH vs Not NAFLD: FC = 2.41<br>Definite NASH vs Borderline NASH: FC = 2.11                                               | Diverse roles in inflammation, cell growth, signaling, and death, and maintenance of membrane phospholipids |
| PZP    | Pregnancy-zone protein                                                           | Borderline NASH vs Not NAFLD: FC = -1.58<br>Definite NASH vs Not NAFLD: FC = -3.88<br>Definite NASH vs Borderline NASH: FC = -3.52 | Endopeptidase inhibitor                                                                                     |
| RFC1   | Replication factor C                                                             | Borderline NASH vs Not NAFLD: FC = 1.94                                                                                            | DNA replication and repair                                                                                  |

|          |                                                                |                                                                                         |                                                                                                          |
|----------|----------------------------------------------------------------|-----------------------------------------------------------------------------------------|----------------------------------------------------------------------------------------------------------|
|          | (activator 1) 1, 145kDa                                        |                                                                                         |                                                                                                          |
| RMRP     | RNA component of mitochondrial RNA processing endoribonuclease | Borderline NASH vs Not NAFLD: FC = -2.32<br>Definite NASH vs Not NAFLD: FC = -1.71      | Mitochondrial DNA repair                                                                                 |
| RN7SL1   | RNA, 7SL, cytoplasmic 1                                        | Borderline NASH vs Not NAFLD: FC = -1.71                                                | Mediation of cotranslational insertion of secretory proteins into the lumen of the endoplasmic reticulum |
| RPPH1    | Ribonuclease P RNA component H1                                | Borderline NASH vs Not NAFLD: FC = -3.34<br>Definite NASH vs Not NAFLD: FC = -2.33      | tRNA maturation                                                                                          |
| RPS26P11 | Ribosomal protein S26 pseudogene 11                            | Borderline NASH vs Not NAFLD: FC = 1.73                                                 | Uncharacterized                                                                                          |
| SCARNA10 | Small Cajal body-specific RNA 10                               | Borderline NASH vs Not NAFLD: FC = -2.23<br>Definite NASH vs Not NAFLD: FC = -2.10      | RNA processing                                                                                           |
| SCARNA5  | Small Cajal body-specific RNA 5                                | Borderline NASH vs Not NAFLD: FC = -1.56                                                | RNA processing                                                                                           |
| SLC12A8  | Solute carrier family 12, member 8                             | Definite NASH vs Not NAFLD: FC = -1.95                                                  | Cation/chloride cotransporter                                                                            |
| SLC1A2   | Solute carrier family 1, member 2                              | Definite NASH vs Not NAFLD: FC = 2.458<br>Definite NASH vs Borderline NASH: FC = 2.48   | Sodium- and potassium-dependent glutamate transporter                                                    |
| SLC2A9   | Solute carrier family 2, member 9                              | Definite NASH vs Borderline NASH: FC = 1.92                                             | Urate and fructose transporter                                                                           |
| SLCO4C1  | Solute carrier organic anion transporter family,               | Definite NASH vs Not NAFLD: FC = -1.713<br>Definite NASH vs Borderline NASH: FC = -2.03 | Membrane transport of bile acids, conjugated steroids,                                                   |

|         |                                                  |                                                                                                                                 |                                                                                                          |
|---------|--------------------------------------------------|---------------------------------------------------------------------------------------------------------------------------------|----------------------------------------------------------------------------------------------------------|
|         | member 4C1                                       |                                                                                                                                 | eicosanoids, peptides, and drugs                                                                         |
| SPARCL1 | SPARC-like 1 (hevin)                             | Definite NASH vs Borderline NASH: FC = -2.13                                                                                    | Calcium ion binding                                                                                      |
| SPP1    | Secreted phosphoprotein 1                        | Borderline NASH vs Not NAFLD: FC = 1.91<br>Definite NASH vs Not NAFLD: FC = 5.70<br>Definite NASH vs Borderline NASH: FC = 4.61 | Upregulation of interferon-gamma and interleukin-12                                                      |
| THBS2   | Thrombospondin 2                                 | Definite NASH vs Borderline NASH: FC = 1.88                                                                                     | Tumor growth and angiogenesis inhibition                                                                 |
| TIMP1   | TIMP metalloproteinase inhibitor 1               | Definite NASH vs Not NAFLD: FC = 2.08<br>Definite NASH vs Borderline NASH: FC = 2.03                                            | Matrix metalloproteinase inhibitor                                                                       |
| TM4SF19 | Transmembrane 4 L six family member 19           | Definite NASH vs Not NAFLD: FC = 2.11<br>Definite NASH vs Borderline NASH: FC = 2.14                                            | Uncharacterized                                                                                          |
| TSKU    | Tsukushi small leucine rich proteoglycan homolog | Borderline NASH vs Not NAFLD: FC = -1.56                                                                                        | Signaling molecule inhibition                                                                            |
| VIL1    | Villin 1                                         | Borderline NASH vs Not NAFLD: FC = -1.59<br>Definite NASH vs Not NAFLD: FC = -1.79                                              | Brush border cytoskeleton component that functions in capping, severing, and bundling of actin filaments |

**Supplemental Table 5: Pathways and biological processes enriched in definite NASH relative to borderline NASH**

| Biological Process                       | Direction | Genes                                                                                                                                                   |
|------------------------------------------|-----------|---------------------------------------------------------------------------------------------------------------------------------------------------------|
| Extracellular matrix organization (N=17) | Up        | TGFB1, COL3A1, COL4A1, COL6A3, MFAP4, THBS1, EFEMP1, TIMP1, SPP1, ANXA2, VCAN, LUM, MMP9, CTSK, CASK, COL1A1, COL1A2                                    |
| Cell Adhesion (N=22)                     | Up        | TGFB1, COL3A1, S100A10, NRG1, COL6A3, ITGEB1, MFAP4, THBS1, CLDN11, THBS2, FAT1, THY1, MGP, AEBP1, SPP1, VCAN, CD24, ANTXR1, ROBO1, GPNMB, CASK, COL1A1 |
| Protein targeting to membrane (N=9)      | Down      | RPL23A, RPL26, RPLP0, RPS3A, PEX3, SPCS2, RPS27A, RTP4, RPL7                                                                                            |
| Glutathione Transferase Activity         | Down      | GSTM2, GSTM4                                                                                                                                            |
| Antibacterial humoral response (N=3)     | Up        | IGHA2, IGHM, IGJ                                                                                                                                        |
| Carbohydrate transport (N=5)             | Up        | POM121, SLC2A9, SLC23A2, SLC1A2, FABP5                                                                                                                  |
| Lipid metabolic process (N=14)           | Down      | AADAC, ANG, ASAH2, GOS2, ALDH8A1, GPAM, FABP1, CROT, LIPC, MSMO1, ACOT11, PLD1, FGL1, NR0B2                                                             |
| Defense response (N=12)                  | Down      | CASP1, CASP4, GPAM, RPS27A, KLRC4, CD163, CD5L, PLD1, MARCO, IL33, VCAM1, HIST1H2BK                                                                     |
| Xenobiotic metabolic process (N=3)       | Down      | GSTA2, GSTM1, UGP2                                                                                                                                      |
